# Supplementary material
Source: Springer Nature journal article supplement (https://www.springermedizin.de/resource/supplementary/13633_2012_39_MOESM1_ESM.pdf/9595518)
Supplement: MOESM1 [file 9595518]

**BDC Patients with LDL > 130 or Non-HDL >160**  
**Total # contacted by letter and phone from queries:**  
**105**

**\*Agreed: 18**

**Scheduled: 17**

**Screened: 17**

Not eligible: 8  
LDL <130

**Enrolled: 9**  
(All completed)

**\*Not able to get  
in contact with:  
16**

**\*No answer: 5**

(with multiple letters  
and phone calls)

**\*Interested in future: 3**

- A1c ↑, working on
- In contact with patients

**\*Not eligible: 42**

-A1c > 9.5  
chronically (26)  
-LDL < 130 (16)  
(8 LDL < 130 from  
screening)

**\*Refused: 21**  
-(5) does not want to  
participate and/or take  
medications

-(7) lives too far away;  
moving for college

-(2) psychiatric  
issues/multiple DKA  
episodes

-(3) no longer seen at  
BDC

-(4) other; not interested
